# Supplementary material for: Genetic diversity and molecular evolution of Ornithogalum mosaic virus based on the coat protein gene sequence
Source: PubMed Central journal article supplement (PMC5877448; doi:10.7717/peerj.4550), 2018-03-27
Supplement: peerj-06-4550-s001.pdf [file peerj-06-4550-s001.pdf]

**Table S1** OrMV isolates used in this study

| <b>Isolate</b> | <b>Country</b> | <b>Host origin (Genus)</b> | <b>Collection_date</b> | <b>ACCESSION</b> |
|----------------|----------------|----------------------------|------------------------|------------------|
| C7             | Japan          | Ornithogalum               | 8-Feb-02               | AB079647         |
| C22            | Japan          | Ornithogalum               | n/a                    | AB079648         |
| C23            | Japan          | Ornithogalum               | n/a                    | AB079649         |
| C28            | Japan          | Ornithogalum               | n/a                    | AB079650         |
| 7-3            | Japan          | Ornithogalum               | 19-Sep-02              | AB091835         |
| G              | Japan          | Ornithogalum               | n/a                    | AB091836         |
| OMV-IL         | Israel         | Chenopodium                | 28-Jul-98              | AF080587         |
| Au-Iris        | Australia      | Iris                       | 11-Nov-99              | AF203528         |
| Hangzhou       | China          | Narcissus                  | Jan-00                 | AJ493580         |
| VM-19          | India          | Vanilla                    | n/a                    | AY845013         |
| VM-33          | India          | Vanilla                    | n/a                    | AY845014         |
| nzOrMV-1       | New Zealand    | Ornithogalum               | n/a                    | AY994102         |
| nzOrMV-2       | New Zealand    | Iris                       | n/a                    | AY994106         |
| nzOrMV-3       | New Zealand    | Iris                       | n/a                    | AY994107         |
| OMV-O          | South Africa   | Ornithogalum               | 1990                   | D00615           |
| Lac33          | South Africa   | Lachenalia                 | 2007                   | FJ159371         |
| LachX          | USA            | Lachenalia                 | 2007                   | FJ159372         |
| LQD2           | USA            | Lachenalia                 | 2006                   | FJ159373         |
| OSS-1          | USA            | Ornithogalum               | 2006                   | FJ159374         |
| OSS-5          | USA            | Ornithogalum               | 2006                   | FJ159375         |
| Gla-11         | Netherlands    | Gladiolus                  | 2007                   | FJ573184         |
| North Island   | New Zealand    | Iris                       | 1-Sep-05               | FJ618533         |
| Lucknow        | India          | Gladiolus                  | 15-Jan-11              | JF682235         |
| Bate9          | Australia      | Iris                       | 1-Nov-10               | JN127345         |
| Glad-4         | India          | Gladiolus                  | Mar-11                 | JN692496         |
| Glad-9         | India          | Gladiolus                  | Mar-11                 | JN692497         |
| Glad-7         | India          | Gladiolus                  | Mar-11                 | JN692498         |
| Glad-6         | India          | Gladiolus                  | Jan-12                 | JQ686720         |
| Glad-8         | India          | Gladiolus                  | Jan-12                 | JQ686722         |
| Glad-3         | India          | Gladiolus                  | Jan-12                 | JQ686723         |
| SW3.1          | Australia      | Diuris                     | Aug-11                 | JQ807995         |
| SW3.3          | Australia      | Diuris                     | Aug-11                 | JQ807996         |
| KP             | Australia      | Diuris                     | Aug-11                 | JQ807997         |
| Crocsmia       | Netherlands    | Crocsmia                   | Jun-11                 | KF493898         |
| 2677-NL        | Netherlands    | Crocus                     | 23-Nov-13              | KJ194467         |
| Taeon          | South Korea    | Gladiolus                  | 23-Jun-11              | KU981083         |

n/a, no data available
