# Supplementary material for: Genetic diversity and molecular evolution of Ornithogalum mosaic virus based on the coat protein gene sequence
Source: PubMed Central journal article supplement (PMC5877448; doi:10.7717/peerj.4550), 2018-03-27
Supplement: peerj-06-4550-s002.pdf [file peerj-06-4550-s002.pdf]

**Table S2** Recombination events detected in OrMV CP gene by RDP4 Suites

| <b>No.</b> | <b>Recombinant</b>                     | <b>Break point (nt)</b> | <b>Parent isolate (Major × Minor)</b> | <b>Methods with P-value (<math>&lt; 10^{-4}</math>)<sup>*</sup></b> |
|------------|----------------------------------------|-------------------------|---------------------------------------|---------------------------------------------------------------------|
| 1          | Crocospia                              | 571-749                 | Glad-6 × Unknown                      | G, B, M, C, S, 3S                                                   |
| 2          | Glad-7                                 | 407-751                 | Glad-4 (Glad-9) × Unknown             | G, M, S, 3S                                                         |
| 3          | OMV-O, 7-3, OMV-IL, nzOrMV-1, nzOrMV-2 | 747-172                 | G × Lucknow                           | R, M, C, 3S                                                         |
| 4          | Glad-8                                 | 256-333                 | Glad-6 × Glad-3                       | G, M, S, 3S                                                         |

<sup>\*</sup>R, RDP; G, Geneconv; B, BootScan; M, Maxchi; C, Chimarera; S, SiScan; 3S, 3Seq
