# Supplementary material for: Genetic diversity and molecular evolution of Ornithogalum mosaic virus based on the coat protein gene sequence
Source: PubMed Central journal article supplement (PMC5877448; doi:10.7717/peerj.4550), 2018-03-27
Supplement: peerj-06-4550-s003.pdf [file peerj-06-4550-s003.pdf]

**Table S3** (a) Genetic diversity parameters estimated for the CP gene of OrMV. (b) Summary of test statistics for population differentiation

| Phylogenetic Group  | Sample size | Haplotypes | Haplotype diversity    |          | Nucleotide diversity   |          |                        |
|---------------------|-------------|------------|------------------------|----------|------------------------|----------|------------------------|
| (a)                 |             |            |                        |          |                        |          |                        |
| Group 1             | 23          | 23         | 1.000 ( $\pm 0.013$ )  |          | 0.106 ( $\pm 0.014$ )  |          |                        |
| Group 2             | 13          | 13         | 1.000 ( $\pm 0.030$ )  |          | 0.117 ( $\pm 0.015$ )  |          |                        |
| Total               | 36          | 30         | 1.000 ( $\pm 0.007$ )  |          | 0.156 ( $\pm 0.010$ )  |          |                        |
| Phylogenetic Group  | $K_{ST}$    | $K_S$      | <i>P-value</i>         | $S_{nn}$ | <i>P-value</i>         | $F_{ST}$ | <i>P-value</i>         |
| (b)                 |             |            |                        |          |                        |          |                        |
| Group 1 vs. Group 2 | 0.296       | 83.545     | < 0.001 <sup>***</sup> | 1.00     | < 0.001 <sup>***</sup> | 0.470    | < 0.001 <sup>***</sup> |

Significance thresholds: \*,  $0.01 < P\text{-value} < 0.05$ ; \*\*,  $0.001 < P\text{-value} < 0.01$ ; \*\*\*,  $P\text{-value} < 0.001$
