# Supplementary material for: Genetic diversity and molecular evolution of Ornithogalum mosaic virus based on the coat protein gene sequence
Source: PubMed Central journal article supplement (PMC5877448; doi:10.7717/peerj.4550), 2018-03-27
Supplement: peerj-06-4550-s004.pdf [file peerj-06-4550-s004.pdf]

**Table S4** (a) Results of CODEML analyses of selective constraint for CP gene of OrMV. (b) Codon positions under positive selection

| OrMV group | Model                                | Parameter estimates (Frequency, $f$ and $\omega$ Values)          | $\chi^2$       | Ln L      | LRT $p$ -value |
|------------|--------------------------------------|-------------------------------------------------------------------|----------------|-----------|----------------|
| (a)        |                                      |                                                                   |                |           |                |
| Clade A    | One-ratio 0 ( $\omega_0=\omega_1$ )  | $\omega_0=\omega_1=0.152$                                         | 7.332          | -6778.939 | <0.001         |
|            | Two-ratio 2 ( $\omega_0, \omega_1$ ) | $\omega_0=0.159, \omega_1=0.055$                                  |                | -6775.272 |                |
| Clade B    | One-ratio 0 ( $\omega_0=\omega_1$ )  | $\omega_0=\omega_1=0.152$                                         | 8.437          | -6778.939 | <0.001         |
|            | Two-ratio 2 ( $\omega_0, \omega_1$ ) | $\omega_0=0.159, \omega_1=0.028$                                  |                | -6774.720 |                |
| OrMV Group | Model (np)                           | Parameter estimates                                               | Positive sites | Ln L      | LRT $p$ -value |
| (b)        |                                      |                                                                   |                |           |                |
| All        | M3 (74)                              | $p: 0.558, 0.442, 0.000$<br>$\omega: 0.050, 0.330, 46.913$        | n/a            | -6115.413 | <0.001         |
|            | M0 (70)                              | $\omega_0: 0.161$                                                 | Not Allowed    | -6169.647 |                |
|            | M2a (73)                             | $p: 0.926, 0.047, 0.028$<br>$\omega: 0.143, 1.000, 1.000$         | n/a            | -6154.614 | 1.000          |
|            | M1a (71)                             | $p: 0.926, 0.074,$<br>$\omega: 0.143, 1.000,$                     | Not Allowed    | -6154.614 |                |
|            | M8 (73)                              | $p_0=0.999, p=0.728, q=3.136$ ( $p_1= 0.00001$ ), $\omega= 1.000$ | n/a            | -6116.037 | 0.999          |
|            | M7 (71)                              | $p= 0.723, q=3.136$                                               | Not Allowed    | -6116.036 |                |
| Clade A    | M3 (48)                              | $p: 0.513, 0.487, 0.000$<br>$\omega: 0.080, 0.464, 34.976$        | n/a            | -4289.288 | <0.001         |
|            | M0 (44)                              | $\omega_0: 0.251$                                                 | Not Allowed    | -4311.891 |                |
|            | M2a (47)                             | $p: 0.865, 0.084, 0.050$<br>$\omega: 0.195, 1.000, 1.000$         | n/a            | -4298.504 | 1.000          |
|            | M1a (45)                             | $p: 0.865, 0.135$<br>$\omega: 0.195, 1.000$                       | Not Allowed    | -4298.504 |                |
|            | M8 (47)                              | $p_0=0.999, p=0.799, q=2.060$ ( $p_1= 0.00001$ ), $\omega= 1.000$ | n/a            | -4289.356 | 0.999          |

|         |          |                                                             |               |           |        |
|---------|----------|-------------------------------------------------------------|---------------|-----------|--------|
| Clade B | M7 (45)  | $p=0.799, q=2.060$                                          | Not Allowed   | -4289.356 |        |
|         | M3 (30)  | $p: 0.807, 0.193, 0.000$<br>$\omega: 0.022, 0.317, 36.191$  | n/a           | -2470.915 | <0.001 |
|         | M0 (26)  | $\omega_0: 0.072$                                           | Not Allowed   | -2488.257 |        |
|         | M2a (29) | $p: 0.955, 0.03314, 0.012$<br>$\omega: 0.052, 1.000, 1.000$ | n/a           | -2476.363 | 1.000  |
|         | M1a (27) | $p: 0.955, 0.045$<br>$\omega: 0.052, 1.000$                 | Not Allowed   | -2476.363 |        |
|         | M8 (29)  | $p_0=0.993, p=0.196, q=1.883 (p_1=0.007), \omega=1.694$     | 15S, 30S, 36Q | -2469.270 | 0.107  |
|         | M7 (27)  | $p=0.176, q=1.494$                                          | Not Allowed   | -2471.507 |        |

---
