# Supplementary material for: Genetic diversity and molecular evolution of Ornithogalum mosaic virus based on the coat protein gene sequence
Source: PubMed Central journal article supplement (PMC5877448; doi:10.7717/peerj.4550), 2018-03-27

**Figure S1**

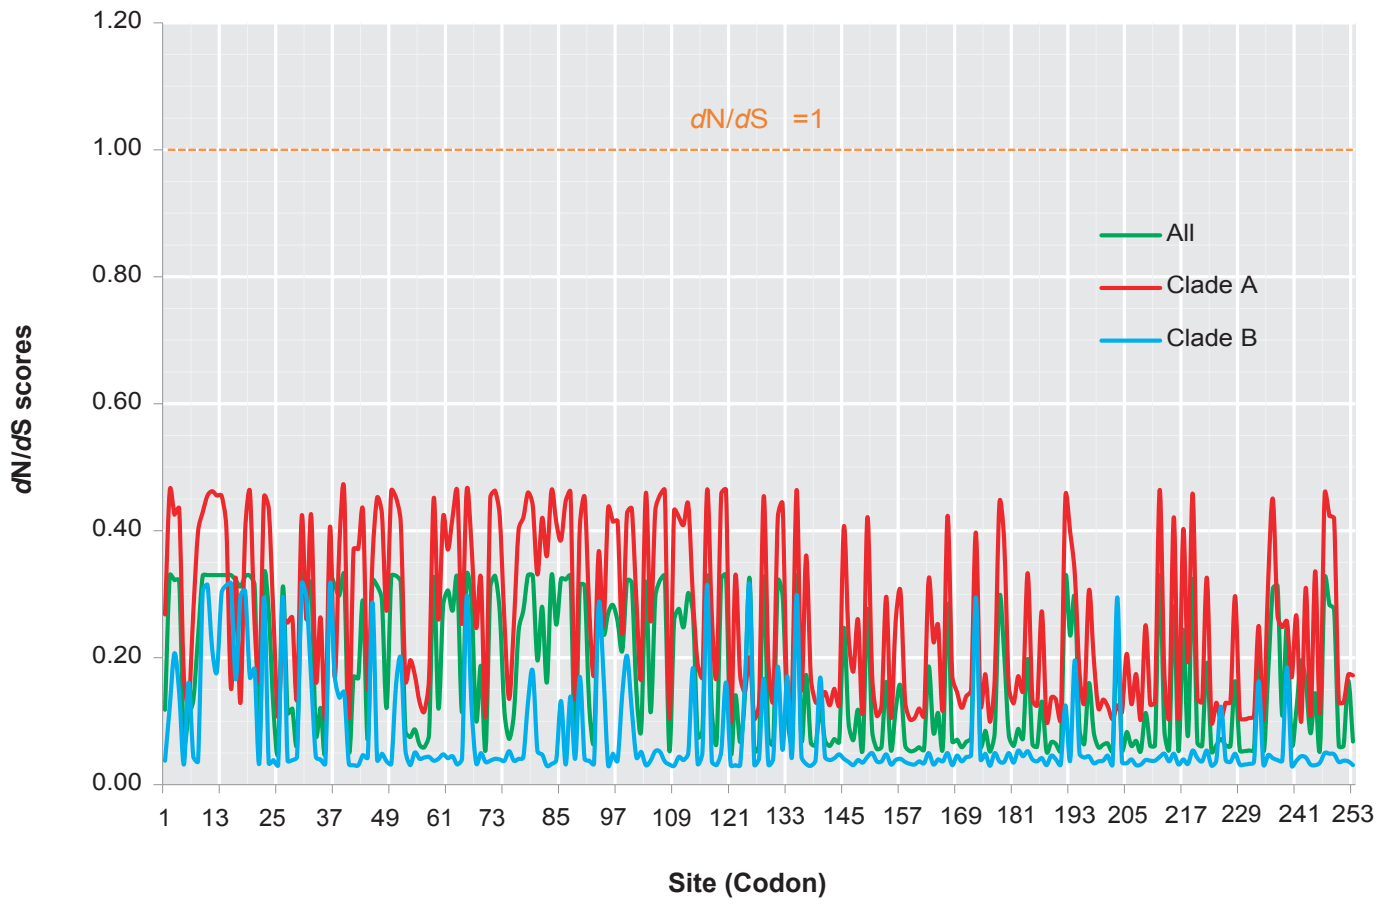

Supplement: peerj-06-4550-s005.pdf [file peerj-06-4550-s005.pdf]
